# Adaptation in plant genomes: bigger is different

Wenbin Mei<sup>1</sup>, Markus G Stetter<sup>1</sup>, Daniel J Gates<sup>1</sup>, Michelle C Stitzer<sup>1,2</sup>, and Jeffrey Ross-Ibarra<sup>\*1,2,3</sup>

<sup>1</sup>Dept. of Plant Sciences, University of California, Davis, CA 95616

<sup>2</sup>Center for Population Biology, University of California, Davis, CA 95616

<sup>3</sup>Genome Center, University of California, Davis, CA 95616

October 10, 2017

Since their origin 160 million years ago, flowering plants have rapidly diversified into more than 300,000 species, adapting to a striking array of habitats and conditions. In this time, flowering plants have dominated some of the most diverse and extreme environments, harnessed a number of specialized biotic interactions in order to ensure successful pollen and seed dispersal, and adapted to meet the demands of agriculture. Given their diversity and importance, a considerable body of research has been devoted to understanding plant adaptation (Tiffin and Ross-Ibarra, 2014), but the relative importance of the various factors that may impact the process of adaptation are still not well understood. For instance, transitions in polyploidy and mating system have long been considered plausible drivers of flowering plant adaptation (Soltis et al., 2009; Goldberg and Igić, 2012), but both are also associated with evolutionary dead ends (Mayrose et al., 2011; Igić and Busch, 2013). As another example, while the effective size of plant populations is expected to correlate with estimates of the efficiency of natural selection, empirical support for this prediction is mixed (Strasburg et al., 2010; Gossmann et al., 2010). A number of aspects of adaptation have received a degree of theoretical (Hermisson and Pennings, 2017; Ralph and Coop, 2010) or empirical (Strasburg et al., 2012; Anderson et al., 2013; Ågren et al., 2013; Yeaman et al., 2016) support, but it is clear we are far from understanding all of the factors underlying the process of adaptation in flowering plants.

Here we propose that genome size may play a previously under-appreciated role in determining how plants adapt. Rather than focus on the mechanisms of genome size variation (Lynch et al., 2016; Lynch and Conery, 2003) or the adaptive significance of genome size itself (Grime and Mowforth, 1982; Bilinski et al., 2017), our **functional space hypothesis** predicts that interspecific differences in genome size may affect the process of adaptation by changing the number and location of potentially functional mutations. Below, we outline an argument for why existing differences in genome size — spanning more than three orders of magnitude across flowering plants (Gaut and Ross-Ibarra, 2008) — may lead to differences in “functional space”, and what this implies about adaptation in plant genomes.

---

\*rossibarra@ucdavis.edu

## 36 Larger genomes have more functional space

37 Mutation rates are typically reported at the level of individual nucleotides, but unless these  
38 rates change in larger genomes, plants with more nucleotides will inevitably be subject to  
39 more mutations *per genome* in each generation. And because variation in gene number across  
40 plants is not substantial (Bennetzen et al., 2005), most of the additional mutational input  
41 in larger genomes occurs outside of coding sequence.

42  
43 But not only nucleotides mutate. By definition, large genomes are a consequence of inser-  
44 tion of additional base pairs. In plants, diploid genome size expansion is often the result of  
45 amplification of transposable elements (TEs). In addition to the nucleotides contributed by  
46 their insertion, the presence of TEs can generate variation in gene expression and regulation  
47 and even generate genome rearrangements (Chuong et al., 2016; Lisch, 2013). Beyond TEs,  
48 structural variation such as inversions are likely to be abundant in large genomes due to  
49 their association with unstable intergenic DNA. Inversions have often been found to play  
50 an oversized role in plant adaptation, from perenniality in monkeyflower (Lowry and Willis,  
51 2010) to flowering time in maize (Navarro et al., 2017) and *Boechera* (Lee et al., 2017) to  
52 fecundity under drought in *Arabidopsis* (Fransz et al., 2016). Other structural variation is  
53 likely more common in larger genomes as well. Gene movement is frequent in large genomes  
54 such as wheat and barley (Wicker et al., 2011), frequently due to the action of transposable  
55 elements (Morgante et al., 2005). Variation in gene copy number is also common (Żmieńko  
56 et al., 2014), and has been identified as the source of a number of different adaptations  
57 (Pham et al., 2017; Prunier et al., 2017).

58  
59 Together, nucleotide changes and structural changes combine to contribute an increased  
60 influx of new variation in large plant genomes. Because some portion of these mutations  
61 will have phenotypic consequences, this new variation provides greater mutational “space”  
62 on which selection can act. While clearly most mutational changes are unlikely to impact  
63 function, especially in intergenic regions, if even a small fraction of this mutational input in  
64 larger genomes impacts phenotype, selection can act to maintain or remove these mutations  
65 in populations. Indeed, the quantity of expressed intergenic sequence appears to scale with  
66 genome size (Lloyd et al., 2017), and machine learning approaches predict a substantial mi-  
67 nority of these sequences are likely functional (Lloyd et al., 2017). And though evidence of  
68 functionality is difficult to come by for most species, substantially more loci associated with  
69 phenotypic variation are found in intergenic regions far from genes (Figure 1) in the large  
70 genome of maize than the small *Arabidopsis* genome.

71  
72 We envision that new mutations in intergenic regions are most likely to impact function if  
73 they affect regulatory sequence. Regulatory sequences across the genome can be identified  
74 by their signature of open chromatin via nuclease (MNase-seq or DNase-seq) or transposase  
75 (ATAC-seq) accessibility (e.g. Oka et al., 2017). Evidence that open chromatin may be a  
76 useful proxy for functional sequence can be found in maize, where open chromatin makes  
77 up less than 1% of the genome but nucleotide variation in such regions explains more than  
78 40% of phenotypic variation across traits (Rodgers-Melnick et al., 2016). For the additional  
79 mutational input in larger genomes to be functional, we expect to find more of the intergenic

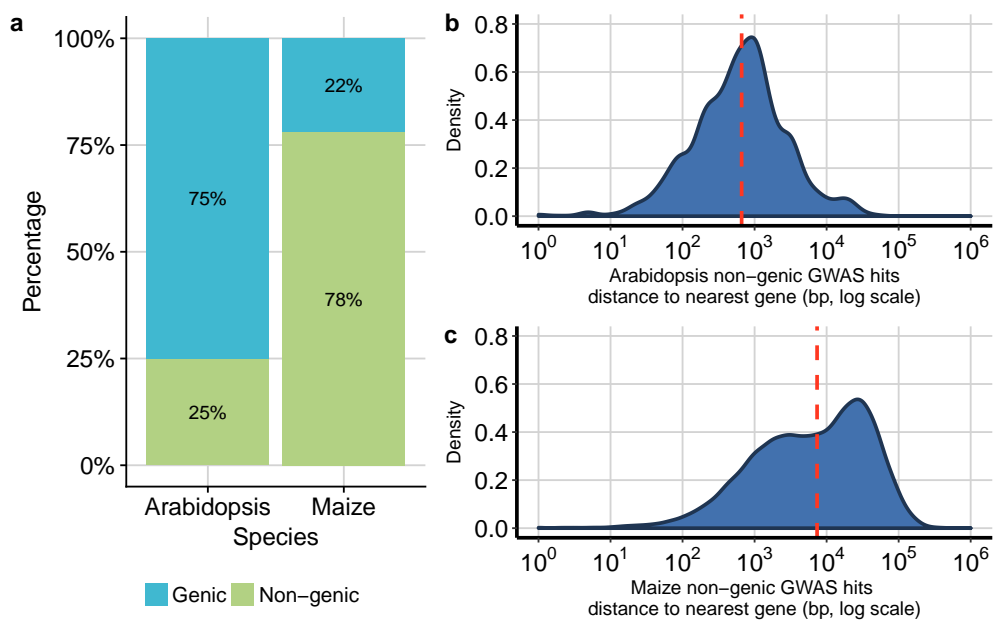

Figure 1: **Genomic distribution of loci identified in genome-wide association studies in *Arabidopsis* and maize.** *Arabidopsis* GWAS hits are top associations from the AraGWAS catalog (<https://aragwas.1001genomes.org>), and maize GWAS hits are the curated results of the nested association mapping population from maize diversity project (<https://www.panzea.org>) (Wallace et al., 2014). (a) Proportion of significant GWAS hits in genic (exon and intron) and non-genic regions. (b-c) Density plots of non-genic GWAS hits in (b) *Arabidopsis* and (c) maize. Dotted red lines indicate medians.

80 sequence in large genomes as open chromatin and "functional space". In line with these  
81 expectations, Maher et al. (2017) show that total accessible chromatin space increases as  
82 genome size increases across four species ranging almost an order of magnitude in genome  
83 size ( $p=0.11$ , adjusted  $R^2 = 0.11$ ; Figure 2a), and that the largest increase in chromatin  
84 between species is in intergenic regions. Although chromatin accessibility data prepared in  
85 different labs and from different tissues makes direct comparison difficult, aggregated data  
86 from a broad range of species is also suggestive of increases in non-exonic open chromatin as  
87 genome size increases (Figure 2b).

88

89 In total, larger genomes have more mutational input, most of which occurs in intergenic  
90 regions. Some proportion of this mutational input leads to additional open chromatin,  
91 increasing the "functional space" of large genomes.

## 92 Large genomes adapt primarily through mutations in 93 regulatory regions

94 One common approach to study adaptation polarizes synonymous and nonsynonymous sub-  
95 stitutions using sequence comparison to an outgroup. Because nonsynonymous mutations  
96 are more likely to be functional, an observed excess of nonsynonymous substitutions com-  
97 pared to expectations from synonymous sites likely reflects the effects of positive selection.

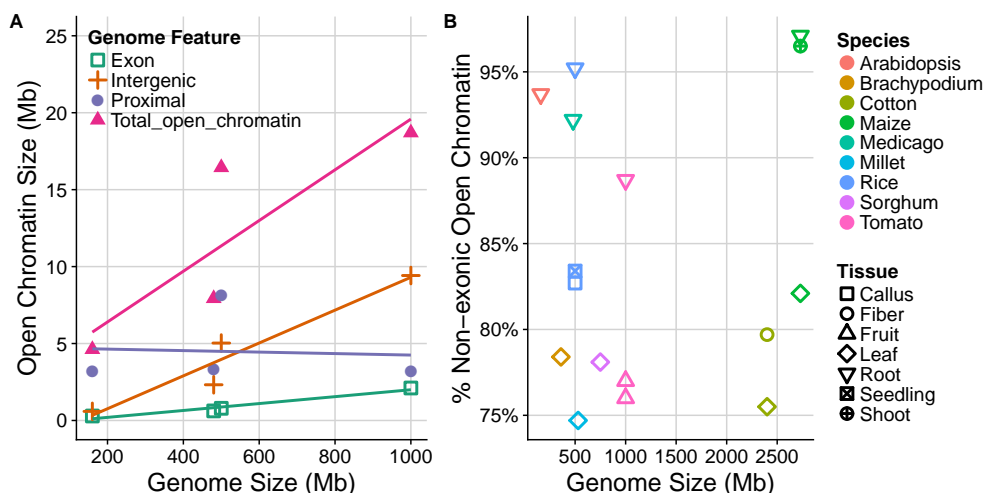

Figure 2: **Open chromatin and genome size.** (a) The total amount of open chromatin scales with genome size in four species *Arabidopsis thaliana*, *Medicago truncatula*, *Solanum lycopersicum* and *Oryza sativa* (Maher et al., 2017). Intergenic regions are defined >2kb from the transcription start site and >1kb from the transcription termination site. (b) Percentage of open chromatin outside of exons scales with genome size across many species. References and details of analyses for this figure can be found at [https://github.com/RILAB/AJB\\_MutationalTargetSize\\_GenomeSize](https://github.com/RILAB/AJB_MutationalTargetSize_GenomeSize)

98 The proportion of adaptive nonsynonymous substitutions ( $\alpha$ ) is used to infer the strength  
 99 or efficiency of natural selection (Eyre-Walker, 2006). But as most of the additional func-  
 100 tional mutations in large genomes occur in regulatory regions outside of genes (Figure 2), as  
 101 genomes increase in size, a larger proportion of adaptive variation should occur outside genes  
 102 and enrichment for nonsynonymous substitutions should decrease. Limited evidence for this  
 103 effect can be found in two studies of environmental adaptation, where putatively selected  
 104 loci are enriched for nonsynonymous mutations in the small *Arabidopsis* genome (Hancock  
 105 et al., 2011) but for noncoding sequence near genes in the larger teosinte genome (Pyhäjärvi  
 106 et al., 2013). We thus predict that, all else being equal, plants with larger genomes should  
 107 exhibit lower  $\alpha$  values than species with smaller genomes. After correcting for phylogeny,  
 108 we indeed observe such a negative slope ( $p=0.12$ ; Figure 3), and a negative correlation is  
 109 also evident within the only two well-sampled genera available (*Helianthus* and *Pinus*). The  
 110 effect we predict may be relatively weak overall, however, as a number of other factors such  
 111 as effective population size and population structure (Gossmann et al., 2010) have also been  
 112 suggested to impact  $\alpha$ . Published data of  $\alpha$  for species with small genome size are biased to-  
 113 wards species with a small effective population size — and thus less efficient natural selection  
 114 — which might influence the correlation between  $\alpha$  and genome size in our meta-analysis  
 115 (Figure 3).

## 116 Sweeps are softer in larger genomes

117 At the onset of a new selective pressure, adaptation can either proceed using genetic varia-  
 118 tion currently segregating in the population or by acting upon *de novo* beneficial mutations

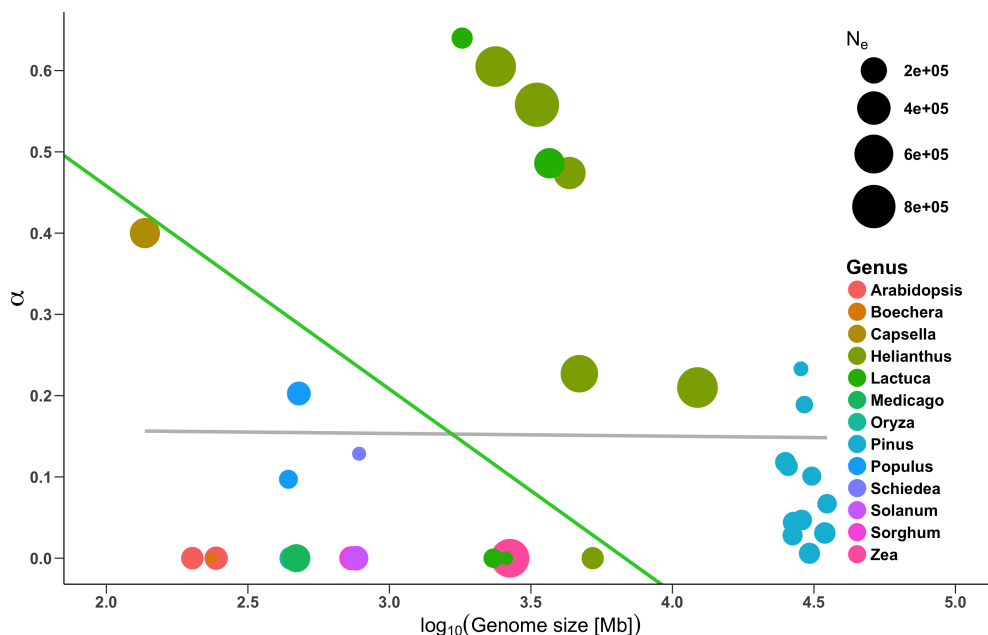

Figure 3: **Pattern of adaptive substitutions and genome size.** The proportion of adaptive substitutions ( $\alpha$ ) across plants with different genome sizes. Colors represent genera and point sizes show estimates of the effective population size ( $N_e$ ). Lines represent regression analyses performed with (green) and without (black) phylogenetic correction. References and details of analyses for this figure can be found at [https://github.com/RILAB/AJB\\_MutationalTargetSize\\_GenomeSize](https://github.com/RILAB/AJB_MutationalTargetSize_GenomeSize)

119 as they enter the population. If mutations are limited, adaptation occurs predominantly by  
120 new beneficial mutations, which rapidly reach high frequency and leave a footprint of reduced  
121 local genetic diversity known as a “hard sweep” (Smith and Haigh, 1974). A number of other  
122 modes of adaptation are possible, however, and often collectively referred to as “soft sweeps”.  
123 If substantial functional variation currently exists in the population, adaptation can make  
124 use of existing variants and affect surrounding genetic diversity to a lesser degree (Hermisson  
125 and Pennings, 2017). Similarly, if the influx of new beneficial mutations across multiple  
126 loci is sufficiently high, adaptation can occur via partial sweeps that increase the frequency  
127 — but not fix — multiple independent beneficial mutations (Hermisson and Pennings, 2017).

128  
129 A key component in determining which of these processes take place as adaptation progresses  
130 is the mutational target size — what we term here more generally as “functional space”. More  
131 formally, the likelihood of sweeps being hard or soft depends on the population mutation  
132 rate  $\theta_b$ , which is the product of twice the effective population size ( $N_e$ ) and the genome-wide  
133 beneficial mutation rate ( $U_b$ ) (Hermisson and Pennings, 2017). While there is little evidence  
134 that the effective size of plant populations scales with genome size (Whitney et al., 2010),  
135 as we argue above the genome-wide rate of beneficial mutations should increase as genomes  
136 increase in size. Theory suggests that soft sweeps should predominate whenever  $\theta_b > 1$   
137 (Hermisson and Pennings, 2017), leading to the prediction that adaptation from extant  
138 variation or multiple independent mutations should be more common in larger genomes.  
139 Although empirical examinations of the amount of soft and hard sweeps across populations

140 is still scarce, patterns of diversity around nonsynonymous substitutions in the small *Capsella*  
141 *grandiflora* genome suggests a predominance of hard sweeps (Williamson et al., 2014), while  
142 similar analyses in the larger maize genome find little evidence for hard sweeps around  
143 nonsynonymous substitutions (Beissinger et al., 2016).

## 144 **Functional space and adaptation in plant genomes**

145 Here we have proposed the **functional space hypothesis**, positing that mutational target  
146 size scales with genome size, impacting the number, source, and genomic location of beneficial  
147 mutations that contribute to adaptation. Though motivated by preliminary evidence, mostly  
148 from *Arabidopsis* and maize, more data are needed before any rigorous assessment of the  
149 hypothesis can be made. If correct, the functional space hypothesis suggests that we should  
150 expect plants with large genomes to exhibit more functional mutations outside of genes,  
151 more regulatory variation, and likely less signal of strong selective sweeps reducing diversity.  
152 These differences have implications for how we study the evolution and development of  
153 plant genomes, from where we should look for signals of adaptation to what patterns we  
154 expect adaptation to leave in genetic diversity or gene expression data. While flowering  
155 plant genomes vary across more than three orders of magnitude in size, most studies of both  
156 functional and evolutionary genomics have focused on species at the extreme small edge of  
157 this scale. Our hypothesis predicts that methods and results from these small genomes may  
158 not replicate well as we begin to explore large plant genomes. Finally, while we have focused  
159 here on evidence from plant genomes, we see no *a priori* reason why similar arguments might  
160 not hold in other taxa as well.

## 161 **Acknowledgments**

162 The authors wish to acknowledge funding support from the NSF (IOS-1238014) and the  
163 USDA (Hatch project CA-D-PLS-2066-H) as well as Roger Deal, Pär K Ingvarsson, Toni I.  
164 Gossmann, and Aurélien Tellier for access to raw data. We thank Graham Coop and Stephen  
165 Wright for helpful discussion and Peter Tiffin, Vince Buffalo, the Prost journal club, and  
166 numerous other colleagues for comments on an early draft of the paper.

## 167 **References**

- 168 Jon Ågren, Christopher G Oakley, John K McKay, John T Lovell, and Douglas W Schemske.  
169 Genetic mapping of adaptation reveals fitness tradeoffs in *arabidopsis thaliana*. *Proceedings*  
170 *of the National Academy of Sciences*, 110(52):21077–21082, 2013.
- 171 Jill T Anderson, Cheng-Ruei Lee, Catherine A Rushworth, Robert I Colautti, and Thomas  
172 Mitchell-Olds. Genetic trade-offs and conditional neutrality contribute to local adaptation.  
173 *Molecular Ecology*, 22(3):699–708, 2013.
- 174 Timothy M Beissinger, Li Wang, Kate Crosby, Arun Durvasula, Matthew B Hufford, and



- 175 Jeffrey Ross-Ibarra. Recent demography drives changes in linked selection across the maize  
176 genome. *Nature plants*, 2:16084, 2016.
- 177 Jeffrey L Bennetzen, Jianxin Ma, and Katrien M Devos. Mechanisms of recent genome size  
178 variation in flowering plants. *Annals of botany*, 95(1):127–132, 2005.
- 179 Paul Bilinski, Patrice S Albert, Jeremy J Berg, James Birchler, Mark Grote, Anne Lorant,  
180 Juvenal Quezada, Kelly Swarts, Jinliang Yang, and Jeff Ross-Ibarra. Parallel altitudinal  
181 clines reveal adaptive evolution of genome size in *zea mays*. *bioRxiv*, page 134528, 2017.
- 182 Edward B Chuong, Nels C Elde, and Cédric Feschotte. Regulatory activities of transposable  
183 elements: from conflicts to benefits. *Nature Reviews Genetics*, 2016.
- 184 Adam Eyre-Walker. The genomic rate of adaptive evolution. *Trends in ecology & evolution*,  
185 21(10):569–575, 2006.
- 186 Paul Fransz, Gabriella Linc, Cheng-Ruei Lee, Saulo Alves Aflitos, Jesse R Lasky, Christopher  
187 Toomajian, Hoda Ali, Janny Peters, Peter Dam, Xianwen Ji, et al. Molecular, genetic and  
188 evolutionary analysis of a paracentric inversion in *arabidopsis thaliana*. *The Plant Journal*,  
189 88(2):159–178, 2016.
- 190 Brandon S Gaut and Jeffrey Ross-Ibarra. Selection on major components of angiosperm  
191 genomes. *science*, 320(5875):484–486, 2008.
- 192 Emma E Goldberg and Boris Igić. Tempo and mode in plant breeding system evolution.  
193 *Evolution*, 66(12):3701–3709, 2012.
- 194 Toni I Gossmann, Bao-Hua Song, Aaron J Windsor, Thomas Mitchell-Olds, Christopher J  
195 Dixon, Maxim V Kapralov, Dmitry A Filatov, and Adam Eyre-Walker. Genome wide  
196 analyses reveal little evidence for adaptive evolution in many plant species. *Molecular  
197 biology and evolution*, 27(8):1822–1832, 2010.
- 198 JP Grime and MA Mowforth. Variation in genome size an ecological interpretation. *Nature*,  
199 299(5879):151–153, 1982.
- 200 Angela M Hancock, Benjamin Brachi, Nathalie Faure, Matthew W Horton, Lucien B Jary-  
201 mowycz, F Gianluca Sperone, Chris Toomajian, Fabrice Roux, and Joy Bergelson. Adap-  
202 tation to climate across the *arabidopsis thaliana* genome. *Science*, 334(6052):83–86, 2011.
- 203 Joachim Hermisson and Pleuni S Pennings. Soft sweeps and beyond: understanding the  
204 patterns and probabilities of selection footprints under rapid adaptation. *Methods in  
205 Ecology and Evolution*, 8(6):700–716, 2017.
- 206 Boris Igić and Jeremiah W Busch. Is self-fertilization an evolutionary dead end? *New  
207 Phytologist*, 198(2):386–397, 2013.
- 208 Cheng-Ruei Lee, Baosheng Wang, Julius P Mojica, Terezie Mandáková, Kasavajhala VSK  
209 Prasad, Jose Luis Goicoechea, Nadeesha Perera, Uffe Hellsten, Hope N Hundley, Jenifer  
210 Johnson, et al. Young inversion with multiple linked qtls under selection in a hybrid zone.  
211 *Nature Ecology & Evolution*, 1:0119, 2017.

- 212 Damon Lisch. How important are transposons for plant evolution? *Nature Reviews. Genetics*,  
213 14(1):49, 2013.
- 214 John P Lloyd, Zing TY Tsai, Rosalie P Sowers, Nicholas L Panchy, and Shin-Han Shiu.  
215 Defining the functional significance of intergenic transcribed regions based on heteroge-  
216 neous features of phenotype genes and pseudogenes. *bioRxiv*, page 127282, 2017.
- 217 David B Lowry and John H Willis. A widespread chromosomal inversion polymorphism  
218 contributes to a major life-history transition, local adaptation, and reproductive isolation.  
219 *PLoS biology*, 8(9):e1000500, 2010.
- 220 Michael Lynch and John S Conery. The origins of genome complexity. *science*, 302(5649):  
221 1401–1404, 2003.
- 222 Michael Lynch, Matthew S Ackerman, Jean-Francois Gout, Hongan Long, Way Sung, W Kel-  
223 ley Thomas, and Patricia L Foster. Genetic drift, selection and the evolution of the mu-  
224 tation rate. *Nature Reviews Genetics*, 17(11):704–714, 2016.
- 225 Kelsey A Maher, Marko Bajic, Kaisa Kajala, Mauricio Reynoso, Germain Pauluzzi, Don-  
226 nelly A West, Kristina Zumstein, Margaret Woodhouse, Kerry Bubb, Mike Dorrity, et al.  
227 Profiling of accessible chromatin regions across multiple plant species and cell types reveals  
228 common gene regulatory principles and new control modules. *bioRxiv*, page 167932, 2017.
- 229 Itay Mayrose, Shing H Zhan, Carl J Rothfels, Karen Magnuson-Ford, Michael S Barker,  
230 Loren H Rieseberg, and Sarah P Otto. Recently formed polyploid plants diversify at lower  
231 rates. *Science*, 333(6047):1257–1257, 2011.
- 232 Michele Morgante, Stephan Brunner, Giorgio Pea, Kevin Fengler, Andrea Zuccolo, and  
233 Antoni Rafalski. Gene duplication and exon shuffling by helitron-like transposons generate  
234 intraspecies diversity in maize. *Nature genetics*, 37(9):997, 2005.
- 235 J Alberto Romero Navarro, Martha Willcox, Juan Burgueño, Cinta Romay, Kelly Swarts,  
236 Samuel Trachsel, Ernesto Preciado, Arturo Terron, Humberto Vallejo Delgado, Victor  
237 Vidal, et al. A study of allelic diversity underlying flowering-time adaptation in maize  
238 landraces. *Nature genetics*, 49(3):476–480, 2017.
- 239 Rurika Oka, Johan Zicola, Blaise Weber, Sarah N Anderson, Charlie Hodgman, Jonathan I  
240 Gent, Jan-Jaap Wesselink, Nathan M Springer, Huub CJ Hoefsloot, Franziska Turck, et al.  
241 Genome-wide mapping of transcriptional enhancer candidates using dna and chromatin  
242 features in maize. *Genome biology*, 18(1):137, 2017.
- 243 Gina M Pham, Linsey Newton, Krystle Wiegert-Rininger, Brieanne Vaillancourt, David S  
244 Douches, and C Robin Buell. Extensive genome heterogeneity leads to preferential allele  
245 expression and copy number-dependent expression in cultivated potato. *The Plant Journal*,  
246 2017.
- 247 Julien Prunier, Sébastien Caron, and John MacKay. Cnvs into the wild: screening the  
248 genomes of conifer trees (*picea* spp.) reveals fewer gene copy number variations in hybrids  
249 and links to adaptation. *BMC genomics*, 18(1):97, 2017.



- 250 Tanja Pyhäjärvi, Matthew B Hufford, Sofiane Mezmouk, and Jeffrey Ross-Ibarra. Complex  
251 patterns of local adaptation in teosinte. *Genome biology and evolution*, 5(9):1594–1609,  
252 2013.
- 253 Peter Ralph and Graham Coop. Parallel adaptation: one or many waves of advance of an  
254 advantageous allele? *Genetics*, 186(2):647–668, 2010.
- 255 Eli Rodgers-Melnick, Daniel L Vera, Hank W Bass, and Edward S Buckler. Open chromatin  
256 reveals the functional maize genome. *Proceedings of the National Academy of Sciences*,  
257 113(22):E3177–E3184, 2016.
- 258 John Maynard Smith and John Haigh. The hitch-hiking effect of a favourable gene. *Genetics  
259 Research*, 23(1):23–35, 1974.
- 260 Douglas E Soltis, Victor A Albert, Jim Leebens-Mack, Charles D Bell, Andrew H Paterson,  
261 Chunfang Zheng, David Sankoff, P Kerr Wall, Pamela S Soltis, et al. Polyploidy and  
262 angiosperm diversification. *American journal of botany*, 96(1):336–348, 2009.
- 263 Jared L Strasburg, Nolan C Kane, Andrew R Raduski, Aurélie Bonin, Richard Michelmore,  
264 and Loren H Rieseberg. Effective population size is positively correlated with levels of  
265 adaptive divergence among annual sunflowers. *Molecular biology and evolution*, 28(5):  
266 1569–1580, 2010.
- 267 Jared L Strasburg, Natasha A Sherman, Kevin M Wright, Leonie C Moyle, John H Willis,  
268 and Loren H Rieseberg. What can patterns of differentiation across plant genomes tell  
269 us about adaptation and speciation? *Philosophical Transactions of the Royal Society B:  
270 Biological Sciences*, 367(1587):364–373, 2012.
- 271 Peter Tiffin and Jeffrey Ross-Ibarra. Advances and limits of using population genetics to  
272 understand local adaptation. *Trends in ecology & evolution*, 29(12):673–680, 2014.
- 273 Jason G Wallace, Peter J Bradbury, Nengyi Zhang, Yves Gibon, Mark Stitt, and Edward S  
274 Buckler. Association mapping across numerous traits reveals patterns of functional vari-  
275 ation in maize. *PLoS Genet*, 10(12):e1004845, 2014.
- 276 Kenneth D Whitney, Eric J Baack, James L Hamrick, Mary Jo W Godt, Brian C Barringer,  
277 Michael D Bennett, Christopher G Eckert, Carol Goodwillie, Susan Kalisz, Ilia J Leitch,  
278 et al. A role for nonadaptive processes in plant genome size evolution? *Evolution*, 64(7):  
279 2097–2109, 2010.
- 280 Thomas Wicker, Klaus FX Mayer, Heidrun Gundlach, Mihaela Martis, Burkhard Steuer-  
281 nagel, Uwe Scholz, Hana Šimková, Marie Kubaláková, Frédéric Choulet, Stefan Taudien,  
282 et al. Frequent gene movement and pseudogene evolution is common to the large and  
283 complex genomes of wheat, barley, and their relatives. *The Plant Cell Online*, 23(5):  
284 1706–1718, 2011.
- 285 Robert J Williamson, Emily B Josephs, Adrian E Platts, Khaled M Hazzouri, Annabelle  
286 Haudry, Mathieu Blanchette, and Stephen I Wright. Evidence for widespread positive and

- 287 negative selection in coding and conserved noncoding regions of *capsella grandiflora*. *PLoS*  
288 *genetics*, 10(9):e1004622, 2014.
- 289 Sam Yeaman, Kathryn A Hodgins, Katie E Lotterhos, Haktan Suren, Simon Nadeau, Jon C  
290 Degner, Kristin A Nurkowski, Pia Smets, Tongli Wang, Laura K Gray, et al. Convergent  
291 local adaptation to climate in distantly related conifers. *Science*, 353(6306):1431–1433,  
292 2016.
- 293 Agnieszka Żmieńko, Anna Samelak, Piotr Kozłowski, and Marek Figlerowicz. Copy number  
294 polymorphism in plant genomes. *Theoretical and applied genetics*, 127(1):1–18, 2014.
